# Supplementary material for: DNA Demethylation Switches Oncogenic ΔNp63 to Tumor Suppressive TAp63 in Squamous Cell Carcinoma
Source: PubMed Central journal article supplement (PMC9331744; doi:10.3389/fonc.2022.924354), 2022-07-14
Supplement: DataSheet_2.pdf [file DataSheet_2.pdf]

### A *KRT1* mRNA

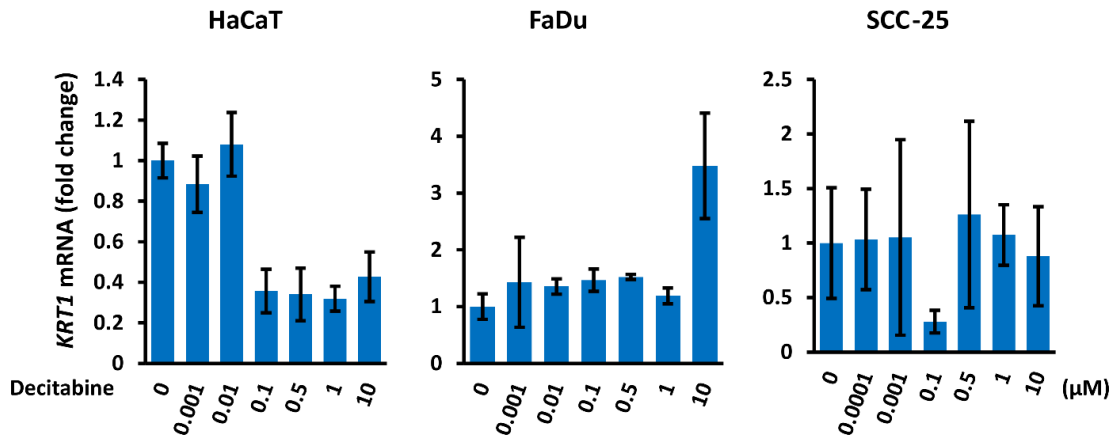

### B *KRT10* mRNA

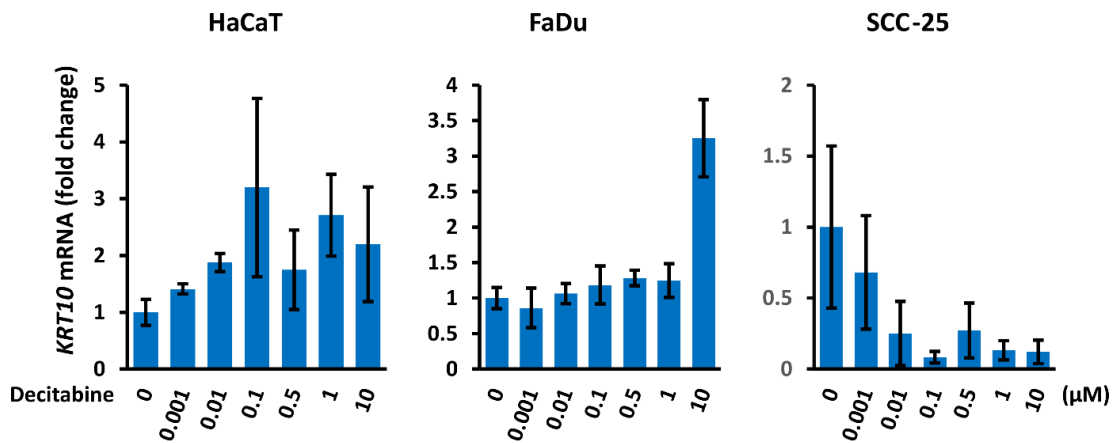

### C *KRT14* mRNA

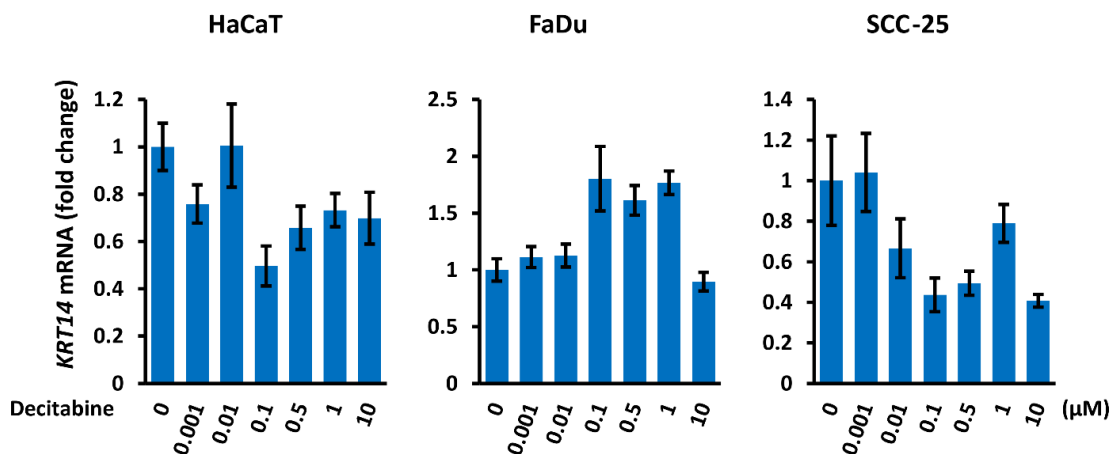

**Supplementary Figure S1.** Changes in *KRT1* and *KRT10* and *KRT14* mRNA after decitabine. Cells were treated with the indicated concentrations of decitabine for four days and analyzed by RT-qPCR. Data are shown as fold change  $\pm$  SEM compared to control cells (0; DMSO only) and are normalized to *ACTB* mRNA (n = 3 biological replicates with technical triplicates for each dose in each cell line).
