# Supplementary material for: DNA Demethylation Switches Oncogenic ΔNp63 to Tumor Suppressive TAp63 in Squamous Cell Carcinoma
Source: PubMed Central journal article supplement (PMC9331744; doi:10.3389/fonc.2022.924354), 2022-07-14
Supplement: DataSheet_3.pdf [file DataSheet_3.pdf]

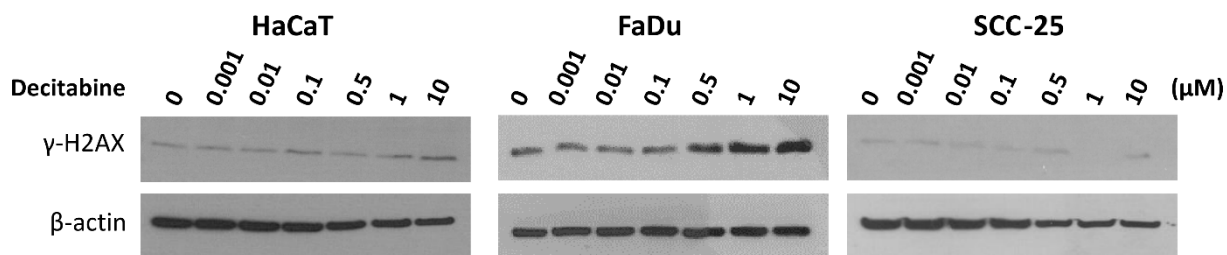

**Supplementary Figure S2. DNA damage after decitabine.** Cells were treated with the indicated concentrations ( $\mu$ M) of decitabine for 4 days and the levels of  $\gamma$ -H2AX were measured by Western blotting. 0; DMSO only. A representative blot is shown (n=3 biological replicates), with  $\beta$ -actin as loading control. (Note that the  $\beta$ -actin blot shown for FaDu is the same as used in Figure 1A, and that for SCC-25 is the same experiment shown in Figure 2A, where multiple proteins were measured using different strips of membrane from the same blot. HaCaT blots are from an additional experiment).
