# Supplementary material for: DNA Demethylation Switches Oncogenic ΔNp63 to Tumor Suppressive TAp63 in Squamous Cell Carcinoma
Source: PubMed Central journal article supplement (PMC9331744; doi:10.3389/fonc.2022.924354), 2022-07-14
Supplement: DataSheet_4.pdf [file DataSheet_4.pdf]

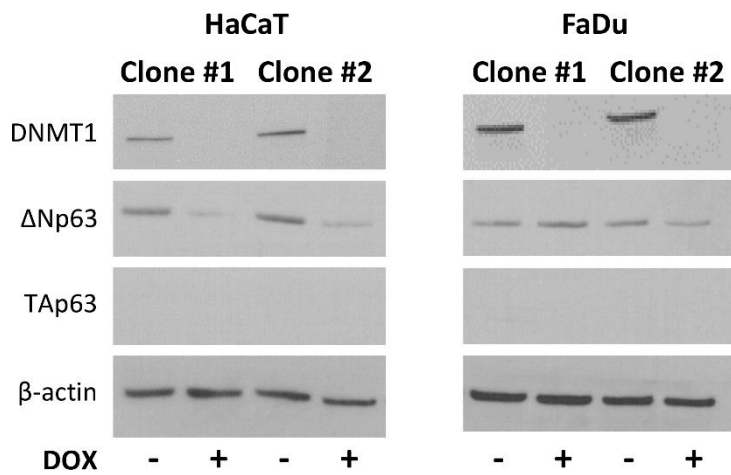

**Supplementary Figure S3.** DNMT1 depletion reduces ΔNp63. Western blotting of DNMT1, ΔNp63 and TAp63 in HaCaT and FaDu cells with or without doxycycline (DOX) induction of DNMT1 shRNA. Two independent clones are shown. β-actin is shown as loading control.
