# Supplementary material for: DNA Demethylation Switches Oncogenic ΔNp63 to Tumor Suppressive TAp63 in Squamous Cell Carcinoma
Source: PubMed Central journal article supplement (PMC9331744; doi:10.3389/fonc.2022.924354), 2022-07-14
Supplement: DataSheet_6.pdf [file DataSheet_6.pdf]

**Supplementary Table 1** *Primer sequences for bisulfite modified PCR and RT-qPCR.*

| Primer                       | Sequence (5' - 3')         |
|------------------------------|----------------------------|
| BSP forward                  | GAGGGGGAAGAATAATAGTAGAGAG  |
| BSP reverse                  | CTCTCCTTCATACATATTTACAAAAC |
| <i>TAP63</i> forward         | GTCCCAGAGCACACAGACAA       |
| <i>TAP63</i> reverse         | TAGCATGGACTGTATCCGCA       |
| $\Delta$ <i>NP63</i> forward | AGCCAGAAGAAAGGACAGCA       |
| $\Delta$ <i>NP63</i> reverse | TCACTAAATTGAGTCTGGGCAT     |
| <i>KRT1</i> forward          | ATGGACAACAACCGCAGTCT       |
| <i>KRT1</i> reverse          | TGCAGCTCTTCATACTTGCTCT     |
| <i>KRT5</i> forward          | CTCATGAACACCAAGCTGGC       |
| <i>KRT5</i> reverse          | CTGCCACTGCCATATCCAGA       |
| <i>KRT10</i> forward         | TCCCAACTGGCCTTGAAACA       |
| <i>KRT10</i> reverse         | TGAGAGCTGCACACAGTAGC       |
| <i>KRT14</i> forward         | ACCTCTCCTCCTCCAGTTC        |
| <i>KRT14</i> reverse         | TCGZGCACATCCATGACCTT       |
| <i>ACTB</i> forward          | GCCGACAGGATGCAGAAGGAG      |
| <i>ACTB</i> reverse          | CTAGAAGCATTGCGGTGGAC       |

BSP, bisulfite sequencing PCR primer; red bases represent bisulfite converted residues (C->T; G->A). All other sequences were used for RT-qPCR.
